# Supplementary material for: MT4-MMP deficiency increases patrolling monocyte recruitment to early lesions and accelerates atherosclerosis
Source: PubMed Central journal article supplement (PMC5834547; doi:10.1038/s41467-018-03351-4), 2018-03-02
Supplement: 41467_2018_3351_MOESM3_ESM.pdf [file 41467_2018_3351_MOESM3_ESM.pdf]

## Description of Additional Supplementary Files

File Name: Supplementary Data 1

Description: **List of predicted cleavage sites in the human  $\alpha\text{M}\beta\text{2}$  integrin by the protease MT4-MMP.** List of predicted cleavage sites in the human  $\alpha\text{M}\beta\text{2}$  integrin by the protease MT4-MMP determined by CleavPredict (<http://cleavpredict.sanfordburnham.org/>). A and B after the residue number denotes its presence in the  $\alpha\text{M}$  or  $\beta\text{2}$  integrin chains. Those exposed sites with higher score for cleavage have been highlighted in grey. Cleavage site in position 977A was selected for validation (highlighted in green).

File Name: Supplementary Movie 1

Description: **Crawling of patrolling monocytes in MT4-MMP WT mice with IgG.** Directly labeled antibodies to CD115 (red) and Ly6C (green) were injected into mice previously injected with isotype IgG. Intravital microscopy recording in the cremaster was performed 4 h after injection of CCL2.

File Name: Supplementary Movie 2

Description: **Crawling of patrolling monocytes in MT4-MMP-null mice with IgG.** Directly labeled antibodies to CD115 (red) and Ly6C (green) were injected into mice previously injected with isotype IgG. Intravital microscopy recording in the cremaster was performed 4 h after injection of CCL2.

File Name: Supplementary Movie 3

Description: **Crawling of patrolling monocytes in MT4-MMP WT mice with Itgam blocking antibody.** Directly labeled antibodies to CD115 (red) and Ly6C (green) were injected into mice previously injected with anti-Itgam blocking antibody. Intravital microscopy recording in the cremaster was performed 4 h after injection of CCL2.

File Name: Supplementary Movie 4

Description: **Crawling of patrolling monocytes in MT4-MMP-null mice with Itgam blocking antibody.** Directly labeled antibodies to CD115 (red) and Ly6C (green) were injected into mice previously injected with anti-Itgam blocking antibody. Intravital microscopy recording in the cremaster was performed 4 h after injection of CCL2.
